# Supplementary material for: Adherence to low-dose methotrexate in children with juvenile idiopathic arthritis using a sensitive methotrexate assay
Source: Springer Nature journal article supplement (doi:10.1186/s12969-024-00988-y), 2024-05-07
Supplement: MOESM1 [file 27065504]

## SUPPLEMENTARY MATERIALS

Table S1. Association between adherence and JAMAR child, after one year

|                                    | <b>Adherent (n=7)</b> | <b>Possibly non-adherent (n=6)</b> | <b>P-value (Fishers')</b> |
|------------------------------------|-----------------------|------------------------------------|---------------------------|
| Self-reported adherence issues (n) |                       |                                    |                           |
| - Yes                              | 2 (28.6)              | 2 (33.3)                           | 1.00                      |
| - No                               | 5 (71.4)              | 4 (66.7)                           |                           |

Jamar, Juvenile Arthritis Multidimensional Assessment Report

Table S2. Association between adherence and concomitant use of biologicals

|                                      | <b>Adherent (n=33)</b> | <b>Possibly non-adherent (n=10)</b> | <b>P-value (Fishers')</b> |
|--------------------------------------|------------------------|-------------------------------------|---------------------------|
| Concomitant biological treatment (n) |                        |                                     |                           |
| - Yes                                | 15 (45.5%)             | 2 (20.0%)                           | 0.27                      |
| - No                                 | 18 (54.5%)             | 8 (80.0%)                           |                           |
